# Supplementary material for: Phylogeny, classification, and character evolution of tribe Citharexyleae (Verbenaceae)
Source: bioRxiv or medRxiv preprint supplement (doi:10.1101/2020.10.08.331355), 2020-10-08
Supplement: Supplementary file [file media-1.pdf]

C. spinosum\_RG096\_113  
 C. hirtellum\_LAF82  
 C. hirtellum\_LAF84  
 C. spinosum\_JCS5727  
 C. spinosum\_RG014\_04  
 C. hexangulare\_LAF73  
 C. hexangulare\_LAF87  
 C. hexangulare\_LAF51  
 C. calvum\_LAF79  
 C. calvum\_LAF80  
 C. berlandieri\_LAF65  
 C. caudatum\_RG096\_73  
 C. macradenium\_BH26603  
 C. hexangulare\_C27709  
 C. macradenium\_BH26602  
 C. hidalgense\_BBG740291  
 C. berlandieri\_RHM11926  
 C. standleyi\_LAF1282  
 C. standleyi\_L1797  
 C. standleyi\_AM3011  
 C. scabrum\_F359\_94  
 C. glabrum\_JCSN17646  
 C. glabrum\_JAMS312  
 C. guatemalense\_JC1827  
 C. C. caudatum\_CSM2352  
 C. ellipticum\_LAF78  
 C. ellipticum\_LAF75  
 C. ellipticum\_LAF77  
 C. ellipticum\_LAF74  
 C. ellipticum\_EC14571  
 C. fulgidum\_MRR544  
 C. ligustrinum\_KEW  
 C. ovatifolium\_MV00781  
 C. berlandieri\_FTG  
 C. mocinoi\_LAF54  
 C. mocinoi\_LAF60  
 C. mocinoi\_LAF59  
 C. mocinoi\_longibracteolatum\_LAF71  
 C. decorum\_LAF144  
 C. decorum\_LAF146  
 C. decorum\_LAF145  
 C. decorum\_LAF142  
 C. decorum\_LAF147  
 C. decorum\_LAF143  
 C. decorum\_IA1262  
 C. donnell\_smithi\_UWBG  
 C. costaricensis\_RL1136  
 C. donnell\_smithi\_LAF14\_10  
 C. donnell\_smithi\_LAF14\_11  
 C. donnell\_smithi\_BH26607  
 C. cooperi\_BH25538  
 C. costaricensis\_LAF14\_01  
 C. decorum\_IA1262  
 C. decorum\_LAF143  
 C. decorum\_LAF142  
 C. decorum\_LAF147  
 C. decorum\_LAF144  
 C. decorum\_LAF146  
 C. decorum\_LAF145  
 C. karstenii\_LAF13\_03A  
 C. karstenii\_LAF13\_16  
 C. karstenii\_LAF13\_03B  
 C. karstenii\_LAF13\_15  
 C. scottiiMEX\_LAF83  
 C. costaricensis\_E626  
 C. subthyrsoideum\_MGG30  
 C. ovatifolium\_GW11813  
 C. scottiiMEX\_LAF82  
 C. mexicanum\_S625  
 C. crassifolium\_FW733  
 C. scottiiCR\_LAF14\_07  
 C. scottiiCR\_LAF14\_04  
 C. scottiiCR\_LAF14\_09  
 C. mexicanum\_FC\_F243  
 C. hexangulare\_C22715  
 C. glabrum\_RCD3121  
 C. glabrum\_GM10169  
 C. steyermarkii\_DEB40360  
 C. roxanae\_AC2683  
 C. roxanae\_RM23834  
 C. hidalgense\_JR22356  
 C. hidalgense\_A1971  
 C. hidalgense\_PT530  
 C. brachyanthum\_JAE2609  
 C. brachyanthum\_JWC11623  
 C. lycoides\_C154  
 C. C. lycoides\_S955  
 C. racemosum\_M5997  
 C. rosei\_CWJ8180  
 C. brachyanthum\_RTC17479  
 C. brachyanthum\_FC9112  
 C. affine\_VS  
 C. affine\_TW3014  
 C. affine\_V6743  
 C. hintonii\_GHT534  
 C. dentatum\_LAF80  
 C. dentatum\_D3130  
 C. dentatum\_BS2014  
 C. dentatum\_PL109\_09  
 C. sulcatum\_LAF13\_07B  
 C. sulcatum\_LAF13\_08  
 C. ilicifolium\_LAF152  
 C. ilicifolium\_LAF135  
 C. ilicifolium\_KEW  
 C. ilicifolium\_LAF137  
 C. flexuosum\_LAF118  
 C. flexuosum\_LAF109  
 C. flexuosum\_LAF89  
 C. flexuosum\_PL109\_13  
 C. flexuosum\_LAF110  
 C. flexuosum\_LAF111  
 C. flexuosum\_PL109\_19  
 C. flexuosum\_LAF117  
 C. montevdensis\_RG004\_101  
 C. montevdensis\_RG004\_102  
 C. joergensenii\_EF1711  
 C. andinum\_F2628  
 C. weberbaueri\_LAF103  
 C. weberbaueri\_PL109\_04  
 C. weberbaueri\_LAF124  
 C. weberbaueri\_LAF126  
 C. weberbaueri\_LAF105  
 C. weberbaueri\_LAF125  
 C. weberbaueri\_LAF106  
 C. weberbaueri\_LAF120  
 C. peruvianum\_LAF123  
 C. peruvianum\_LAF121  
 C. peruvianum\_S17122  
 C. peruvianum\_LAF100  
 C. peruvianum\_LAF59  
 C. kobuskianum\_LAF116  
 C. kobuskianum\_LAF115  
 C. kobuskianum\_LAF114  
 C. montanum\_LAF132  
 C. montanum\_LAF133  
 C. montanum\_LAF129  
 C. montanum\_LAF13\_25  
 C. montanum\_LAF13\_10  
 C. montanum\_LAF131  
 C. subflavescens\_LAF13\_06  
 C. subflavescens\_LAF13\_01  
 C. subflavescens\_LAF13\_27  
 C. rimbachii\_LAF139  
 C. rimbachii\_LAF138  
 C. poeppigii\_LAF13\_11  
 C. poeppigii\_LAF13\_12  
 C. ulei\_LAF126  
 C. ulei\_LAF130  
 C. Ballonia\_amarabilis\_MC4522  
 C. solanaceum\_RW341  
 C. myrianthum\_AK758  
 C. kunthianum\_LAF13\_23A  
 C. kunthianum\_LAF13\_23  
 C. kunthianum\_LAF13\_19B  
 C. kunthianum\_LAF141  
 C. kunthianum\_LAF140  
 C. microphyllum\_RGN4084  
 C. microphyllum\_ARS6802  
 C. alaini\_VSR2959A  
 C. argutidentatum\_RG009\_32  
 C. pachyphyllum\_EWD1655  
 C. pachyphyllum\_BV471  
 C. herrerae\_RG009\_21  
 C. herrerae\_RG009\_11  
 C. argutidentatum\_RG009\_36  
 C. altamirano\_GJD9971  
 C. altamirano\_M12032  
 C. altamirano\_RH47024  
 C. altamirano\_EC2609  
 Rehdera\_penninervia\_MPCNB1378  
 Rehdera\_penninervia\_CLEC19938  
 Rehdera\_trinervis\_EMS30531  
 Rehdera\_trinervis\_DN2686  
 Casselia\_glaziovii\_MAS3630  
 Verbena\_officinalis\_RG003\_156  
 Hierbotana\_inflata\_JH6199  
 Lantana\_depressa\_PL112\_01  
 Nastha\_inaguensis\_WT313097  
 Lampayo\_castellani\_RG007\_63

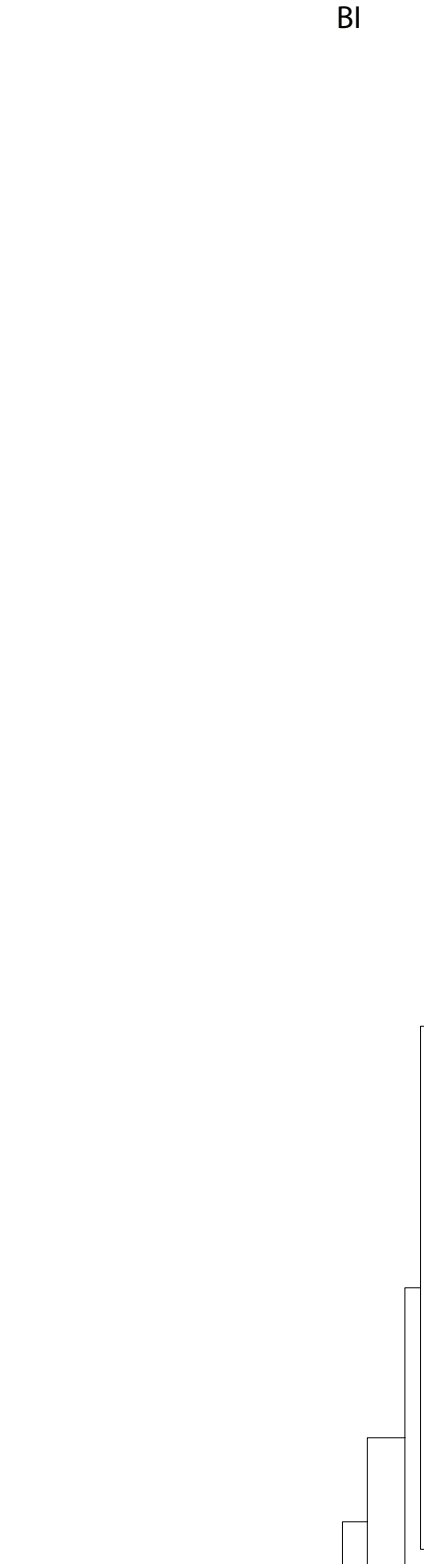

C. hirtellum\_LAF82  
 C. spinosum\_RG096\_113  
 C. hirtellum\_LAF84  
 C. spinosum\_JCS5727  
 C. spinosum\_RG014\_04  
 C. hexangulare\_LAF73  
 C. hexangulare\_LAF87  
 C. hexangulare\_LAF51  
 C. calvum\_LAF79  
 C. calvum\_LAF80  
 C. berlandieri\_LAF65  
 C. caudatum\_JC1827  
 C. macradenium\_BH26603  
 C. hexangulare\_C27709  
 C. macradenium\_BH26602  
 C. hidalgense\_BBG740291  
 C. berlandieri\_RHM11926  
 C. standleyi\_LAF1282  
 C. standleyi\_L1797  
 C. standleyi\_AM3011  
 C. scabrum\_F359\_94  
 C. glabrum\_JCSN17646  
 C. glabrum\_JAMS312  
 C. guatemalense\_JC1827  
 C. C. caudatum\_CSM2352  
 C. ellipticum\_LAF78  
 C. ellipticum\_LAF77  
 C. ellipticum\_LAF74  
 C. ellipticum\_LAF75  
 C. ellipticum\_EC14571  
 C. fulgidum\_MRR544  
 C. ligustrinum\_KEW  
 C. ovatifolium\_MV00781  
 C. berlandieri\_FTG  
 C. mocinoi\_LAF54  
 C. mocinoi\_LAF60  
 C. mocinoi\_LAF59  
 C. mocinoi\_longibracteolatum\_LAF71  
 C. costaricensis\_RL1136  
 C. donnell\_smithi\_UWBG  
 C. donnell\_smithi\_LAF14\_10  
 C. donnell\_smithi\_LAF14\_11  
 C. donnell\_smithi\_BH26607  
 C. cooperi\_BH25538  
 C. costaricensis\_LAF14\_01  
 C. decorum\_IA1262  
 C. decorum\_LAF143  
 C. decorum\_LAF142  
 C. decorum\_LAF147  
 C. decorum\_LAF144  
 C. decorum\_LAF146  
 C. decorum\_LAF145  
 C. karstenii\_LAF13\_03A  
 C. karstenii\_LAF13\_16  
 C. karstenii\_LAF13\_03B  
 C. karstenii\_LAF13\_15  
 C. ovatifolium\_GW11813  
 C. scottiiMEX\_LAF83  
 C. scottiiMEX\_LAF82  
 C. costaricensis\_E626  
 C. subthyrsoideum\_MGG30  
 C. ovatifolium\_GW11813  
 C. scottiiMEX\_LAF83  
 C. scottiiMEX\_LAF82  
 C. mexicanum\_S625  
 C. crassifolium\_FW733  
 C. scottiiCR\_LAF14\_07  
 C. scottiiCR\_LAF14\_04  
 C. scottiiCR\_LAF14\_09  
 C. mexicanum\_FC\_F243  
 C. hexangulare\_C22715  
 C. glabrum\_RCD3121  
 C. glabrum\_GM10169  
 C. steyermarkii\_DEB40360  
 C. roxanae\_AC2683  
 C. roxanae\_RM23834  
 C. hidalgense\_JR22356  
 C. hidalgense\_A1971  
 C. hidalgense\_PT530  
 C. brachyanthum\_JAE2609  
 C. brachyanthum\_JWC11623  
 C. lycoides\_C154  
 C. C. lycoides\_S955  
 C. racemosum\_M5997  
 C. rosei\_CWJ8180  
 C. brachyanthum\_RTC17479  
 C. brachyanthum\_FC9112  
 C. affine\_VS  
 C. affine\_TW3014  
 C. affine\_V6743  
 C. hintonii\_GHT534  
 C. dentatum\_BS2014  
 C. dentatum\_LAF80  
 C. dentatum\_D3130  
 C. dentatum\_BS2014  
 C. dentatum\_PL109\_09  
 C. sulcatum\_LAF13\_07B  
 C. sulcatum\_LAF13\_08  
 C. ilicifolium\_KEW  
 C. ilicifolium\_LAF137  
 C. ilicifolium\_LAF152  
 C. ilicifolium\_LAF135  
 C. flexuosum\_LAF109  
 C. flexuosum\_LAF89  
 C. flexuosum\_PL109\_13  
 C. flexuosum\_LAF110  
 C. flexuosum\_LAF111  
 C. flexuosum\_PL109\_19  
 C. flexuosum\_LAF117  
 C. montevdensis\_RG004\_101  
 C. montevdensis\_RG004\_102  
 C. joergensenii\_EF1711  
 C. andinum\_F2628  
 C. peruvianum\_LAF121  
 C. peruvianum\_LAF123  
 C. peruvianum\_S17122  
 C. peruvianum\_LAF100  
 C. peruvianum\_LAF59  
 C. kobuskianum\_LAF115  
 C. kobuskianum\_LAF116  
 C. kobuskianum\_LAF114  
 C. weberbaueri\_LAF103  
 C. weberbaueri\_PL109\_04  
 C. weberbaueri\_LAF124  
 C. weberbaueri\_LAF126  
 C. weberbaueri\_LAF105  
 C. weberbaueri\_LAF125  
 C. weberbaueri\_LAF106  
 C. weberbaueri\_LAF120  
 C. montanum\_LAF132  
 C. montanum\_LAF133  
 C. montanum\_LAF129  
 C. montanum\_LAF13\_25  
 C. montanum\_LAF13\_10  
 C. montanum\_LAF131  
 C. subflavescens\_LAF13\_06  
 C. subflavescens\_LAF13\_01  
 C. subflavescens\_LAF13\_27  
 C. rimbachii\_LAF139  
 C. rimbachii\_LAF138  
 C. poeppigii\_LAF13\_11  
 C. poeppigii\_LAF13\_12  
 C. ulei\_LAF126  
 C. ulei\_LAF130  
 C. Ballonia\_amarabilis\_MC4522  
 C. myrianthum\_AK758  
 C. solanaceum\_RW341  
 C. kunthianum\_LAF13\_23A  
 C. kunthianum\_LAF13\_23  
 C. kunthianum\_LAF13\_19B  
 C. kunthianum\_LAF140  
 C. kunthianum\_LAF141  
 C. microphyllum\_ARS6802  
 C. microphyllum\_RGN4084  
 C. alaini\_VSR2959A  
 C. argutidentatum\_RG009\_32  
 C. pachyphyllum\_EWD1655  
 C. pachyphyllum\_BV471  
 C. herrerae\_RG009\_11  
 C. herrerae\_RG009\_21  
 C. argutidentatum\_RG009\_36  
 C. altamirano\_GJD9971  
 C. altamirano\_M12032  
 C. altamirano\_RH47024  
 C. altamirano\_EC2609  
 Rehdera\_penninervia\_CLEC19938  
 Rehdera\_penninervia\_MPCNB1378  
 Rehdera\_trinervis\_EMS30531  
 Rehdera\_trinervis\_DN2686  
 Casselia\_glaziovii\_MAS3630  
 Verbena\_officinalis\_RG003\_156  
 Hierbotana\_inflata\_JH6199  
 Lantana\_depressa\_PL112\_01  
 Nastha\_inaguensis\_WT313097  
 Lampayo\_castellani\_RG007\_63

Pitraea\_cuneato\_ovata\_RG004\_186

Lampayo\_castellani\_RG007\_63

Pitraea\_cuneato\_ovata\_RG004\_186

C. tetramerum\_PT4717  
 C. tetramerum\_M8638  
 C. oleinum\_B3587  
 C. oleinum\_DN2473  
 Recordia\_boliviana\_NRUW2932  
 Duranta\_vestita\_RRRM50

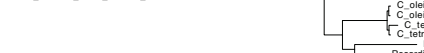

C. oleinum\_B3587  
 C. oleinum\_DN2473  
 C. tetramerum\_M8638  
 C. tetramerum\_PT4717  
 Duranta\_vestita\_RRRM50  
 Recordia\_boliviana\_NRUW2932
