# Supplementary material for: Phylogeny, classification, and character evolution of tribe Citharexyleae (Verbenaceae)
Source: bioRxiv or medRxiv preprint supplement (doi:10.1101/2020.10.08.331355), 2020-10-08
Supplement: Supplementary file [file media-7.pdf]

ML

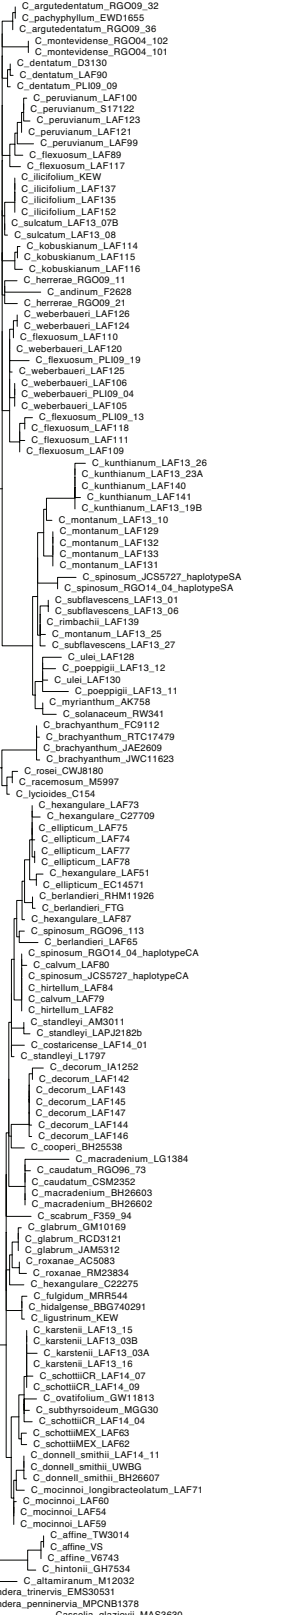

BI

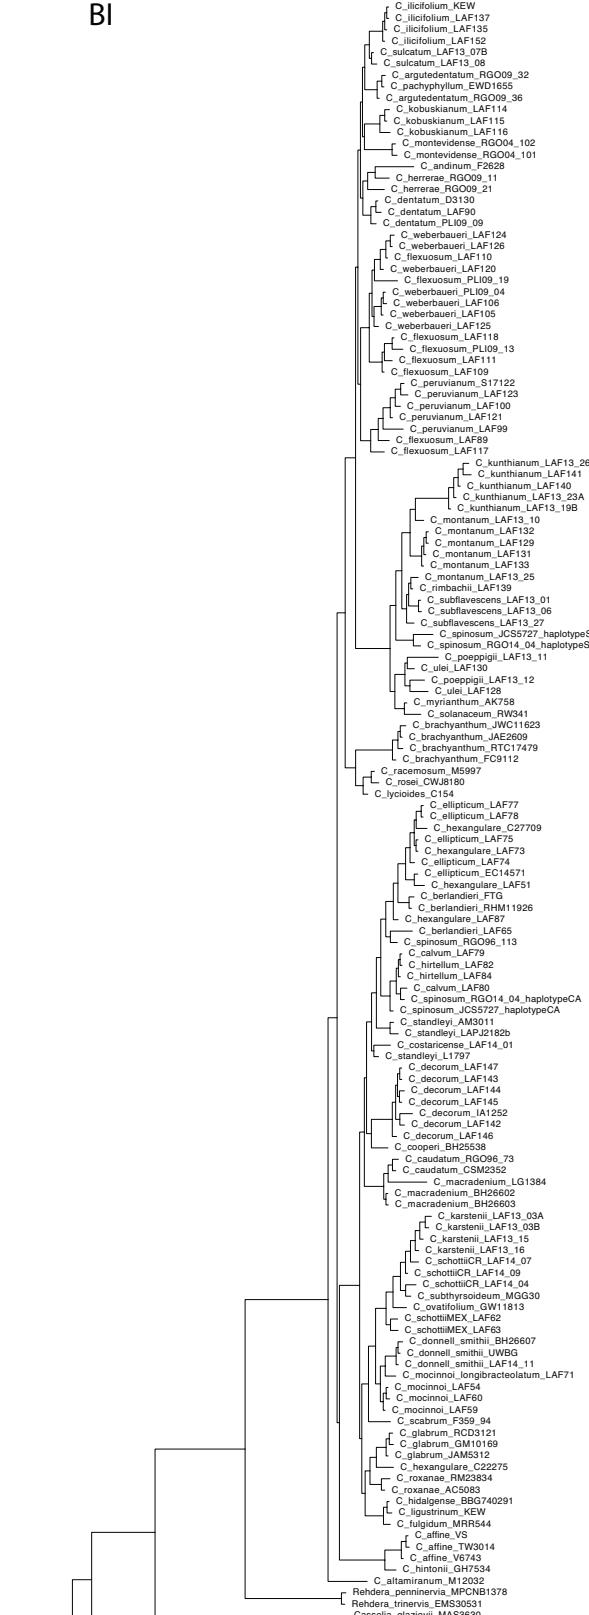

Lampaya, castellani, RGO07\_63  
 C. oleinum\_DN2473\_haploype3  
 C. tetramrum\_M8638  
 C. oleinum\_B3587\_haploype1  
 Recordia, boliviana, NRJW2932  
 Duranta, vestita, RRRM50  
 C. oleinum\_D3587\_haploype2  
 C. oleinum\_DN2473\_haploype1  
 C. oleinum\_DN2473\_haploype2

Lampaya, castellani, RGO07\_63  
 C. oleinum\_B3587\_haploype1  
 C. tetramrum\_M8638  
 C. oleinum\_DN2473\_haploype3  
 Duranta, vestita, RRRM50  
 Recordia, boliviana, NRJW2932  
 C. oleinum\_DN2473\_haploype1  
 C. oleinum\_B3587\_haploype2  
 C. oleinum\_DN2473\_haploype2
