# Supplementary material for: Phylogeny, classification, and character evolution of tribe Citharexyleae (Verbenaceae)
Source: bioRxiv or medRxiv preprint supplement (doi:10.1101/2020.10.08.331355), 2020-10-08

A

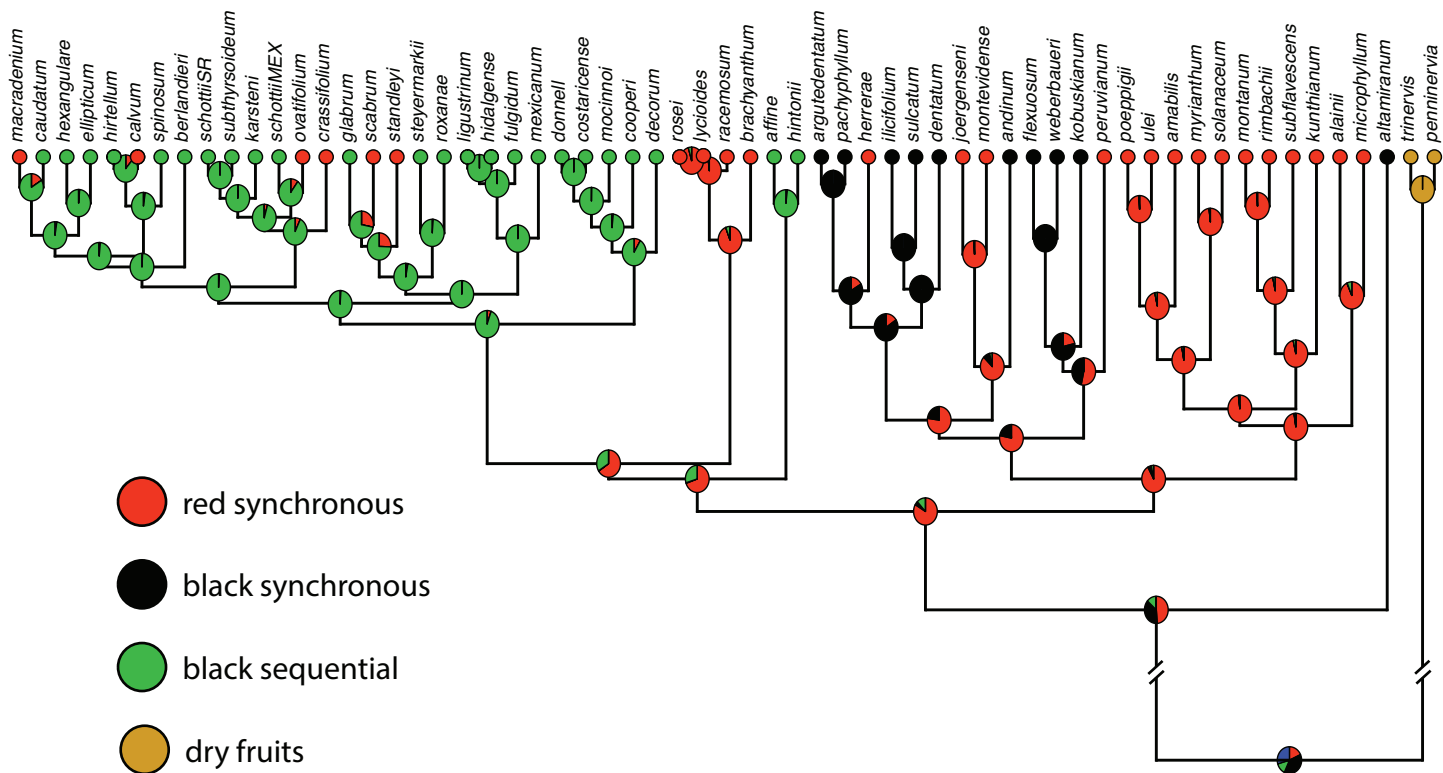

B

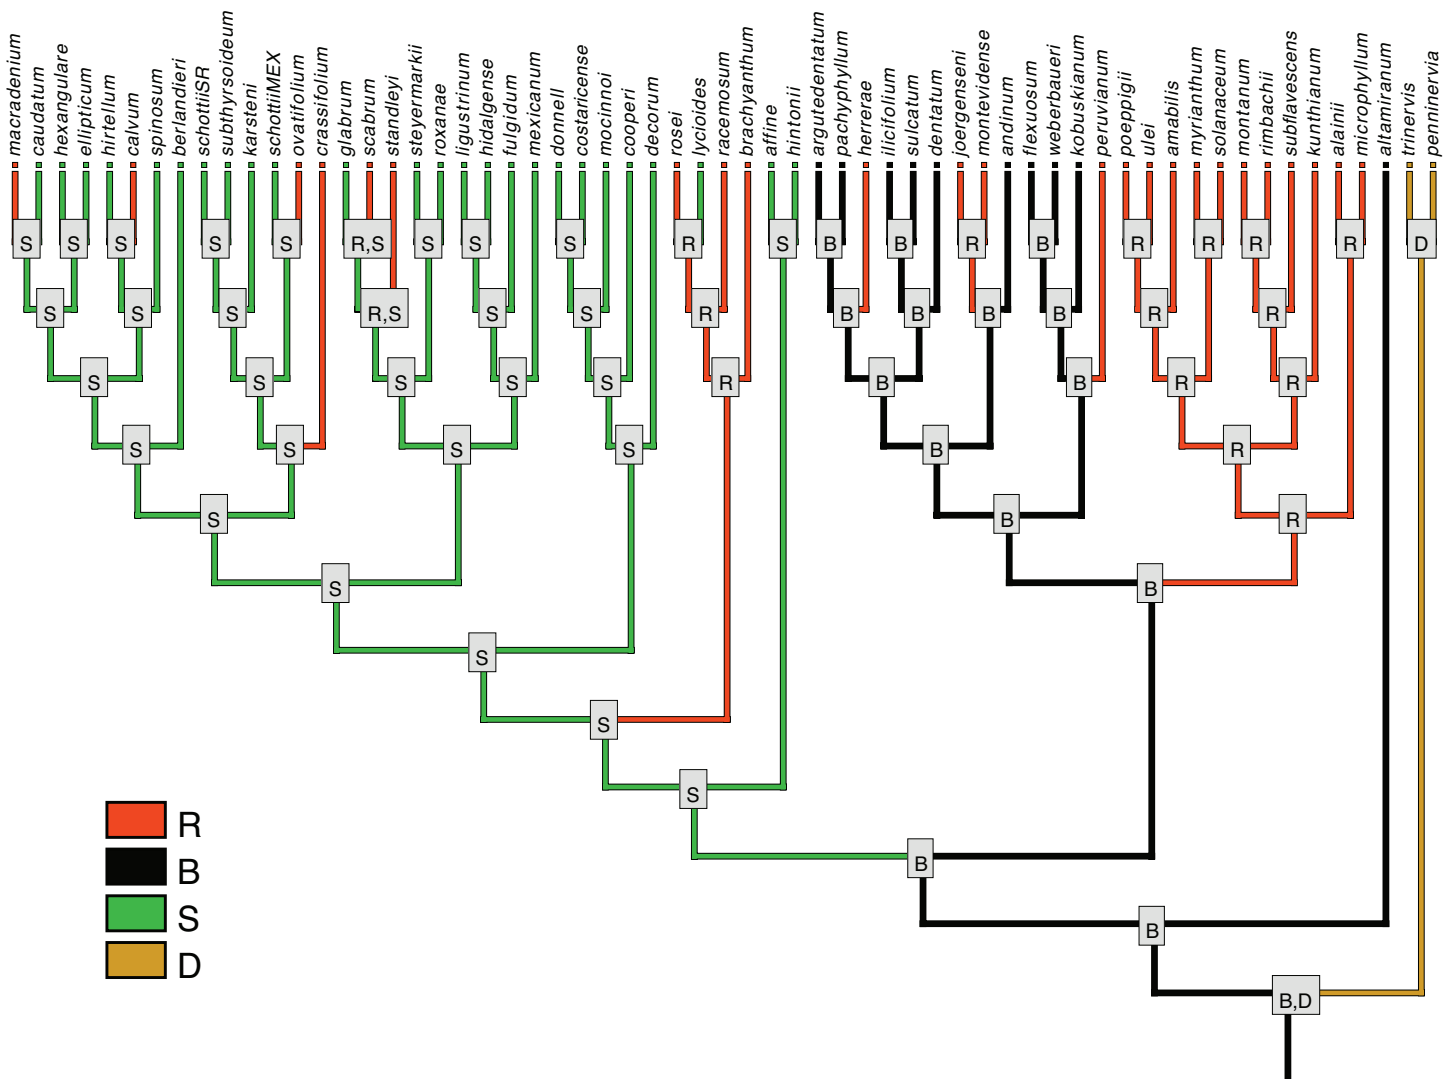

Supplement: Supplementary file [file media-16.pdf]
